# Supplementary material
Source: publisher figshare collection journal article supplement (https://gsapubs.figshare.com/ndownloader/files/23199617)
Supplement: Supplementary file 1 [file 23199617]

## Sheet: PlotDat1
Source sheet	Sheet2	0.0886646	0.0134622	0.0813823	0.0124	0.0819749	0.0124874	0.0891584	0.0134895	0.0889736	0.0134739	0.0887674	0.0134638
Plot name	Concordia1	0.0886967	0.0134575	0.0814907	0.012416	0.083041	0.0126444	0.0891539	0.0134937	0.0889711	0.0134763	0.0887661	0.013465
Plot Type	1	0.0886311	0.0134553	0.0817327	0.0124517	0.0841082	0.0128015	0.0891411	0.0134974	0.0889639	0.0134783	0.0887626	0.0134661
1st free col	15	IsoLine	IsoLine	0.0819749	0.0124874	0.0851764	0.0129587	0.0891201	0.0135004	0.0889521	0.0134801	0.0887567	0.013467
Sigma Level	2			0.0822171	0.0125231	0.0862456	0.0131158	0.0890913	0.0135028	0.0889359	0.0134814	0.0887488	0.0134676
Absolute Errs	FALSE			0.0824594	0.0125588	0.087316	0.013273	0.0890552	0.0135045	0.0889157	0.0134823	0.0887388	0.0134681
Symbol Type	1			0.0827017	0.0125945	0.0883873	0.0134302	0.0890124	0.0135054	0.0888917	0.0134828	0.088727	0.0134683
Inverse Plot	FALSE			0.082944	0.0126302	0.0894598	0.0135874	0.0889637	0.0135057	0.0888644	0.0134829	0.0887136	0.0134683
Color Plot	FALSE			0.0831865	0.0126659	0.0905332	0.0137446	0.0889099	0.0135051	0.0888342	0.0134825	0.0886987	0.0134681
3D plot	FALSE			0.0834289	0.0127016	0.0916078	0.0139019	0.0888518	0.0135039	0.0888016	0.0134817	0.0886827	0.0134677
Linear	FALSE			0.0836715	0.0127373	0.0926834	0.0140592	0.0887906	0.0135019	0.0887673	0.0134805	0.0886658	0.013467
Data Range	B5:F7			0.083914	0.012773	IsoLine	IsoLine	0.0887272	0.0134993	0.0887317	0.0134789	0.0886483	0.0134662
Filled Symbols	TRUE			0.0841567	0.0128087			0.0886627	0.013496	0.0886956	0.0134769	0.0886305	0.0134652
				0.0843994	0.0128444			0.0885982	0.0134921	0.0886594	0.0134746	0.0886127	0.013464
				0.0846421	0.0128801			0.0885349	0.0134878	0.0886239	0.013472	0.0885953	0.0134626
				0.0848849	0.0129158			0.0884738	0.013483	0.0885897	0.0134692	0.0885784	0.0134611
				0.0851278	0.0129515			0.088416	0.0134778	0.0885573	0.0134661	0.0885625	0.0134596
				0.0853707	0.0129872			0.0883624	0.0134724	0.0885272	0.013463	0.0885477	0.0134579
				0.0856137	0.0130229			0.088314	0.0134668	0.0885001	0.0134597	0.0885344	0.0134562
				0.0858567	0.0130587			0.0882716	0.0134611	0.0884763	0.0134564	0.0885227	0.0134545
				0.0860998	0.0130944			0.0882359	0.0134554	0.0884563	0.0134531	0.0885128	0.0134528
				0.0863429	0.0131301			0.0882076	0.0134499	0.0884405	0.0134498	0.088505	0.0134512
				0.0865861	0.0131658			0.0881871	0.0134445	0.088429	0.0134468	0.0884994	0.0134496
				0.0868293	0.0132015			0.0881747	0.0134395	0.088422	0.0134438	0.088496	0.0134481
				0.0870726	0.0132373			0.0881707	0.0134349	0.0884198	0.0134412	0.0884949	0.0134467
				0.0873159	0.013273			0.0881752	0.0134307	0.0884223	0.0134388	0.0884961	0.0134455
				0.0875593	0.0133087			0.088188	0.0134271	0.0884295	0.0134367	0.0884997	0.0134444
				0.0878028	0.0133444			0.088209	0.013424	0.0884413	0.013435	0.0885055	0.0134436
				0.0880463	0.0133802			0.0882378	0.0134216	0.0884575	0.0134337	0.0885135	0.0134429
				0.0882899	0.0134159			0.0882739	0.01342	0.0884777	0.0134328	0.0885234	0.0134425
				0.0885335	0.0134516			0.0883167	0.013419	0.0885017	0.0134323	0.0885352	0.0134422
				0.0887772	0.0134873			0.0883654	0.0134188	0.0885291	0.0134322	0.0885487	0.0134422
				0.0890209	0.0135231			0.0884193	0.0134193	0.0885593	0.0134326	0.0885636	0.0134424
				0.0892647	0.0135588			0.0884773	0.0134205	0.0885918	0.0134334	0.0885796	0.0134429
				0.0895085	0.0135945			0.0885385	0.0134225	0.0886262	0.0134346	0.0885965	0.0134435
				0.0897524	0.0136303			0.0886019	0.0134251	0.0886617	0.0134362	0.088614	0.0134443
				0.0899963	0.013666			0.0886664	0.0134284	0.0886979	0.0134381	0.0886317	0.0134454
				0.0902403	0.0137018			0.0887309	0.0134323	0.088734	0.0134404	0.0886495	0.0134466
				0.0904844	0.0137375			0.0887942	0.0134366	0.0887695	0.013443	0.088667	0.0134479
				0.0907285	0.0137732			0.0888553	0.0134415	0.0888037	0.0134459	0.0886838	0.0134494
				0.0909727	0.013809			0.0889131	0.0134466	0.0888362	0.0134489	0.0886998	0.013451
				0.0912169	0.0138447			0.0889667	0.013452	0.0888662	0.0134521	0.0887146	0.0134526
				0.0914612	0.0138805			0.0890151	0.0134576	0.0888933	0.0134554	0.0887279	0.0134543
				0.0917055	0.0139162			0.0890575	0.0134633	0.0889171	0.0134587	0.0887396	0.013456
				0.0919499	0.013952			0.0890932	0.013469	0.0889371	0.013462	0.0887494	0.0134577
				0.0921943	0.0139877			0.0891215	0.0134745	0.088953	0.0134652	0.0887572	0.0134594
				0.0924388	0.0140235			0.089142	0.0134799	0.0889645	0.0134683	0.0887629	0.013461
				0.0926833	0.0140592			0.0891544	0.0134849	0.0889714	0.0134712	0.0887663	0.0134625
				0.0929279	0.014095			0.0891584	0.0134895	0.0889736	0.0134739	0.0887674	0.0134638
				0.093	0.0141055			ErrEll	ErrEll	ErrEll	ErrEll	ErrEll	ErrEll
				IsoLine	IsoLine

## Sheet: PlotDat4
Source sheet	Sheet2	0.0886646	0.0134622	0.0872	0.013256	0.087316	0.013273	0.0891584	0.0134895	0.0889736	0.0134739	0.0887674	0.0134638
Plot name	Concordia2	0.0886967	0.0134575	0.0872186	0.0132587	0.0875302	0.0133044	0.0891539	0.0134937	0.0889711	0.0134763	0.0887661	0.013465
Plot Type	1	0.0886311	0.0134553	0.0872673	0.0132658	0.0877444	0.0133359	0.0891411	0.0134974	0.0889639	0.0134783	0.0887626	0.0134661
1st free col	15	IsoLine	IsoLine	0.087316	0.013273	0.0879587	0.0133673	0.0891201	0.0135004	0.0889521	0.0134801	0.0887567	0.013467
Sigma Level	2			0.0873646	0.0132801	0.088173	0.0133987	0.0890913	0.0135028	0.0889359	0.0134814	0.0887488	0.0134676
Absolute Errs	FALSE			0.0874133	0.0132873	0.0883873	0.0134302	0.0890552	0.0135045	0.0889157	0.0134823	0.0887388	0.0134681
Symbol Type	1			0.087462	0.0132944	0.0886017	0.0134616	0.0890124	0.0135054	0.0888917	0.0134828	0.088727	0.0134683
Inverse Plot	FALSE			0.0875107	0.0133016	0.0888162	0.0134931	0.0889637	0.0135057	0.0888644	0.0134829	0.0887136	0.0134683
Color Plot	FALSE			0.0875594	0.0133087	0.0890307	0.0135245	0.0889099	0.0135051	0.0888342	0.0134825	0.0886987	0.0134681
3D plot	FALSE			0.0876081	0.0133159	0.0892452	0.013556	0.0888518	0.0135039	0.0888016	0.0134817	0.0886827	0.0134677
Linear	FALSE			0.0876568	0.013323	IsoLine	IsoLine	0.0887906	0.0135019	0.0887673	0.0134805	0.0886658	0.013467
Data Range	B5:F7			0.0877054	0.0133301			0.0887272	0.0134993	0.0887317	0.0134789	0.0886483	0.0134662
Filled Symbols	TRUE			0.0877541	0.0133373			0.0886627	0.013496	0.0886956	0.0134769	0.0886305	0.0134652
				0.0878028	0.0133444			0.0885982	0.0134921	0.0886594	0.0134746	0.0886127	0.013464
				0.0878515	0.0133516			0.0885349	0.0134878	0.0886239	0.013472	0.0885953	0.0134626
				0.0879002	0.0133587			0.0884738	0.013483	0.0885897	0.0134692	0.0885784	0.0134611
				0.0879489	0.0133659			0.088416	0.0134778	0.0885573	0.0134661	0.0885625	0.0134596
				0.0879976	0.013373			0.0883624	0.0134724	0.0885272	0.013463	0.0885477	0.0134579
				0.0880464	0.0133802			0.088314	0.0134668	0.0885001	0.0134597	0.0885344	0.0134562
				0.0880951	0.0133873			0.0882716	0.0134611	0.0884763	0.0134564	0.0885227	0.0134545
				0.0881438	0.0133945			0.0882359	0.0134554	0.0884563	0.0134531	0.0885128	0.0134528
				0.0881925	0.0134016			0.0882076	0.0134499	0.0884405	0.0134498	0.088505	0.0134512
				0.0882412	0.0134087			0.0881871	0.0134445	0.088429	0.0134468	0.0884994	0.0134496
				0.0882899	0.0134159			0.0881747	0.0134395	0.088422	0.0134438	0.088496	0.0134481
				0.0883387	0.013423			0.0881707	0.0134349	0.0884198	0.0134412	0.0884949	0.0134467
				0.0883874	0.0134302			0.0881752	0.0134307	0.0884223	0.0134388	0.0884961	0.0134455
				0.0884361	0.0134373			0.088188	0.0134271	0.0884295	0.0134367	0.0884997	0.0134444
				0.0884848	0.0134445			0.088209	0.013424	0.0884413	0.013435	0.0885055	0.0134436
				0.0885336	0.0134516			0.0882378	0.0134216	0.0884575	0.0134337	0.0885135	0.0134429
				0.0885823	0.0134588			0.0882739	0.01342	0.0884777	0.0134328	0.0885234	0.0134425
				0.088631	0.0134659			0.0883167	0.013419	0.0885017	0.0134323	0.0885352	0.0134422
				0.0886798	0.0134731			0.0883654	0.0134188	0.0885291	0.0134322	0.0885487	0.0134422
				0.0887285	0.0134802			0.0884193	0.0134193	0.0885593	0.0134326	0.0885636	0.0134424
				0.0887772	0.0134874			0.0884773	0.0134205	0.0885918	0.0134334	0.0885796	0.0134429
				0.088826	0.0134945			0.0885385	0.0134225	0.0886262	0.0134346	0.0885965	0.0134435
				0.0888747	0.0135016			0.0886019	0.0134251	0.0886617	0.0134362	0.088614	0.0134443
				0.0889235	0.0135088			0.0886664	0.0134284	0.0886979	0.0134381	0.0886317	0.0134454
				0.0889722	0.0135159			0.0887309	0.0134323	0.088734	0.0134404	0.0886495	0.0134466
				0.089021	0.0135231			0.0887942	0.0134366	0.0887695	0.013443	0.088667	0.0134479
				0.0890697	0.0135302			0.0888553	0.0134415	0.0888037	0.0134459	0.0886838	0.0134494
				0.0891185	0.0135374			0.0889131	0.0134466	0.0888362	0.0134489	0.0886998	0.013451
				0.0891672	0.0135445			0.0889667	0.013452	0.0888662	0.0134521	0.0887146	0.0134526
				0.089216	0.0135517			0.0890151	0.0134576	0.0888933	0.0134554	0.0887279	0.0134543
				0.0892648	0.0135588			0.0890575	0.0134633	0.0889171	0.0134587	0.0887396	0.013456
				0.0893135	0.013566			0.0890932	0.013469	0.0889371	0.013462	0.0887494	0.0134577
				0.0893623	0.0135731			0.0891215	0.0134745	0.088953	0.0134652	0.0887572	0.0134594
				0.0894111	0.0135803			0.089142	0.0134799	0.0889645	0.0134683	0.0887629	0.013461
				0.0894598	0.0135874			0.0891544	0.0134849	0.0889714	0.0134712	0.0887663	0.0134625
				0.0895086	0.0135946			0.0891584	0.0134895	0.0889736	0.0134739	0.0887674	0.0134638
				0.0895458	0.0136			ErrEll	ErrEll	ErrEll	ErrEll	ErrEll	ErrEll
				IsoLine	IsoLine

## Sheet: Data
TABLE S1. U-Pb DATA FOR ANALYZED ZIRCONS FROM ORDOVICIAN K-BENTONITES, MISSOURI, USA
						Ratios						Ages (Ma)
Sample	Pb(c)	Pb*	Th	206 Pb	208 Pb	206 Pb		207 Pb		207 Pb		206 Pb		207 Pb		207 Pb		corr.
Fractions	(pg)	Pb(c)	U	204 Pb	206 Pb	238 U	err	235 U	err	206 Pb	err	238 U	err	235 U	err	206 Pb	err	coef.
(a)	(b)			(c)	(d)	(e)	(2s%)	(e)	(2s%)	(e)	(2s%)		(2s)		(2s)		(2s)
New London Section: 91°20'40.66"W, 39°31'20.69"N
KB-NLD (Deicke)
z1	1.02178	29.69	0.566414	1750.58	0.177143	0.0728741	0.0868771	0.56324	0.590908	0.0560809	0.556244	453.448	0.380407	453.633	2.16181	454.573	12.3656	0.450879
z2	0.412068	121.529	0.530196	7175.61	0.165816	0.0728864	0.0549814	0.563281	0.228577	0.0560755	0.204184	453.522	0.240783	453.66	0.836276	454.36	4.5869	0.4997
z3	0.49981	105.009	0.514072	6228.67	0.160775	0.0728641	0.0711298	0.562826	0.220008	0.0560473	0.195563	453.388	0.311414	453.364	0.80451	453.245	4.39881	0.453658
z4	0.248433	67.0931	0.777347	3732.95	0.243099	0.0729812	0.0766686	0.5634	0.40617	0.0560144	0.379284	454.091	0.336167	453.737	1.48623	451.942	8.45147	0.41709
z5	0.429626	143.588	0.638	8246.3	0.199531	0.0728544	0.0583971	0.562468	0.163505	0.056019	0.140254	453.33	0.255638	453.131	0.597652	452.125	3.19379	0.495051
z6	0.245387	61.0425	0.997431	3226.19	0.311927	0.0729072	0.076301	0.564813	0.327792	0.0562119	0.301509	453.647	0.334239	454.655	1.20135	459.752	6.72309	0.426664
z7	0.393133	114.94	0.568395	6721.08	0.177762	0.0728816	0.067882	0.563981	0.188559	0.0561489	0.15775	453.493	0.297261	454.114	0.690416	457.262	3.57044	0.556969
KB-NLM (Millbrig)
z1	0.309643	76.0326	0.696186	4347.68	0.217728	0.0728455	0.0706485	0.56254	0.260715	0.0560331	0.229851	453.276	0.309234	453.179	0.953057	452.684	5.15198	0.518836
z2	0.617297	45.3796	0.756756	2564.26	0.236669	0.0728654	0.0678056	0.562229	0.372107	0.0559869	0.349428	453.395	0.296866	452.976	1.35977	450.85	7.79255	0.395186
z3	0.278514	60.318	0.545648	3586	0.17065	0.0728609	0.0641009	0.561905	0.313542	0.055958	0.291515	453.369	0.28063	452.766	1.14534	449.703	6.51409	0.408411
z4	0.306379	134.411	0.604824	7848.56	0.189153	0.0729131	0.0679572	0.563382	0.218013	0.056065	0.181864	453.683	0.297711	453.726	0.797719	453.944	4.09848	0.60929
z5	0.361707	49.6835	0.574695	2935.2	0.179734	0.0728474	0.0935754	0.561938	0.487081	0.0559717	0.456943	453.288	0.409596	452.787	1.77933	450.248	10.1738	0.39698
z6	0.267155	45.7572	0.775739	2573.43	0.242609	0.0728121	0.0718142	0.562705	0.419596	0.0560752	0.392903	453.075	0.314202	453.285	1.53414	454.351	8.7492	0.428525
z7	0.367836	57.2894	0.622845	3340.66	0.194792	0.0728598	0.0574238	0.562979	0.316462	0.0560658	0.296005	453.362	0.251394	453.464	1.15742	453.977	6.60833	0.407413
z8	0.220948	39.4016	0.72747	2244.11	0.227501	0.0729852	0.0820623	0.567115	0.451567	0.0563807	0.427457	454.116	0.359835	456.147	1.65929	466.394	9.49401	0.363067
z9	0.28767	31.2971	0.914874	1708.96	0.286106	0.0729647	0.078251	0.563797	0.59074	0.0560666	0.566103	453.992	0.343032	453.995	2.16256	454.007	12.5853	0.363479
KB-NLM2 (Millbrig 2)
z2	0.375582	65.0713	0.691854	3696.87	0.216373	0.0728495	0.0635648	0.563796	0.277791	0.0561552	0.255823	453.3	0.278242	453.994	1.01693	457.511	5.71888	0.417493
z3	0.566959	49.4795	0.648588	2845.66	0.202835	0.072963	0.0726744	0.564983	0.337158	0.0561858	0.314134	453.982	0.318579	454.765	1.23592	458.722	7.0028	0.392962
z4	0.497761	84.976	0.623376	4905.22	0.194957	0.0728702	0.0565832	0.563456	0.21276	0.0561053	0.192684	453.424	0.247747	453.773	0.778566	455.542	4.33403	0.428706
z5	0.355293	70.4549	0.663411	4029.42	0.207475	0.0728927	0.0644615	0.564335	0.252818	0.0561755	0.231271	453.56	0.282323	454.344	0.926074	458.314	5.17816	0.416238
z6	0.412567	61.3078	0.616518	3550.02	0.192804	0.0730004	0.0764395	0.565002	0.306367	0.0561589	0.279659	454.207	0.335244	454.777	1.12307	457.658	6.24374	0.437164
z6b	0.593212	31.6336	0.674942	1814.01	0.211083	0.072863	0.0826057	0.564241	0.562988	0.0561891	0.53556	453.381	0.361652	454.283	2.06201	458.85	11.8985	0.386363
z7	0.306949	32.7996	0.623192	1904.65	0.194902	0.0728399	0.107733	0.562962	0.543485	0.0560795	0.515567	453.243	0.471522	453.453	1.98769	454.518	11.4645	0.342894
Highway MM Section: 90°32'36.11"W, 38°23'38.76"N
KB-HMD (Deicke)
z1	0.397274	137.307	0.60605	7950.11	0.189538	0.0728756	0.075477	0.562408	0.208064	0.0559969	0.153287	453.457	0.330495	453.093	0.760474	451.245	3.47706	0.779142
z2	0.302171	159.486	0.528913	9414.72	0.165416	0.0728586	0.0535528	0.562411	0.158042	0.0560102	0.12903	453.355	0.234444	453.095	0.577645	451.774	2.95148	0.601238
z3	0.343248	167.867	0.563808	9819.86	0.17633	0.0728505	0.0535794	0.562771	0.158458	0.0560522	0.137768	453.306	0.234536	453.328	0.579401	453.44	3.13927	0.46998
z4	0.506521	104.039	0.584305	6061.27	0.182739	0.0728517	0.063821	0.562823	0.209564	0.0560565	0.181114	453.314	0.279371	453.362	0.766317	453.608	4.08232	0.529679
z5	0.322833	234.469	0.473965	14031.1	0.148232	0.0728664	0.0542154	0.562584	0.118839	0.0560214	0.0827445	453.402	0.237368	453.207	0.434443	452.218	1.9692	0.71366
z6	0.301051	189.915	0.606173	10988.7	0.189578	0.0728511	0.0562695	0.562391	0.15808	0.056014	0.124914	453.31	0.246314	453.082	0.577772	451.923	2.86278	0.648273
KB-HMUM (Millbrig)
z1	0.266444	78.8424	0.732735	4431.18	0.229155	0.0728826	0.070533	0.562721	0.331534	0.0560226	0.303767	453.499	0.308874	453.296	1.21219	452.266	6.78167	0.461769
z2	0.279524	101.405	0.725943	5703	0.227033	0.0728593	0.0553647	0.563775	0.226345	0.0561455	0.21134	453.359	0.242378	453.98	0.828575	457.129	4.74161	0.343673
z3	0.44794	50.5244	0.679486	2883.31	0.212505	0.0728634	0.0796346	0.56374	0.37601	0.0561388	0.346443	453.384	0.348646	453.958	1.3764	456.863	7.71849	0.445568
z4	0.400415	107.403	0.689337	6094	0.215587	0.0728428	0.0555818	0.563322	0.2047	0.0561131	0.175954	453.26	0.243277	453.686	0.748954	455.847	3.96803	0.571828
HMKLKB-1 (Kings Lake)
z1	0.315766	25.1989	0.799158	1406	0.249932	0.0728237	0.185562	0.562513	0.729382	0.0560472	0.680267	453.145	0.81199	453.161	2.66621	453.241	15.118	0.379207
z2	0.52947	37.1132	0.780816	2071.23	0.244197	0.0728114	0.0914458	0.562498	0.506298	0.0560552	0.476573	453.072	0.400091	453.151	1.85071	453.556	10.6027	0.394813
z3	0.304278	93.829	0.759968	5235.06	0.237673	0.0728653	0.0886766	0.562848	0.271787	0.0560485	0.249011	453.395	0.388242	453.378	0.993876	453.291	5.57304	0.38807
z4	0.304666	98.4984	0.706601	5566.71	0.220988	0.0728096	0.0655367	0.562605	0.201202	0.0560673	0.167636	453.06	0.286727	453.221	0.735557	454.035	3.78776	0.593658
z5	0.570777	25.9953	0.851742	1431.9	0.266378	0.0728036	0.10974	0.562544	0.658213	0.0560657	0.633209	453.025	0.480082	453.181	2.40614	453.973	14.0728	0.29982
KB-HMUHS (House Springs)
z1	0.255855	84.0391	0.630839	4841.95	0.197296	0.0727866	0.0741879	0.563573	0.334529	0.0561814	0.305586	452.922	0.324481	453.849	1.22432	458.549	6.81441	0.463603
z2	1.35432	18.0332	0.711888	1032.54	0.222645	0.07276	0.109048	0.564121	0.865073	0.0562566	0.837664	452.763	0.476791	454.205	3.168	461.511	18.5823	0.304995
z3	0.268438	95.3365	0.706896	5387.99	0.221083	0.0727745	0.0719441	0.562813	0.297976	0.0561151	0.277802	452.849	0.314618	453.356	1.0896	455.926	6.2047	0.367865
z4	0.275641	191.046	0.647165	10940.1	0.202396	0.0728789	0.0530147	0.563332	0.149811	0.0560863	0.124026	453.477	0.232149	453.693	0.548134	454.787	2.84227	0.557287
z5	0.31059	129.761	0.778003	7201.16	0.24332	0.0727761	0.0606636	0.56232	0.186187	0.0560646	0.167129	452.859	0.265293	453.035	0.680446	453.928	3.77678	0.415869
z6	0.277494	108.892	0.636935	6259.63	0.199203	0.072789	0.0601718	0.562191	0.183118	0.0560419	0.140834	452.937	0.263186	452.952	0.669129	453.029	3.20585	0.739626
Tyson Section: 90°34'15.38"W, 38°31'55.92"N
Deicke-T (Deicke)
z1	0.295652	87.3615	0.77275	4859.95	0.241663	0.0729614	0.0716488	0.564867	0.268329	0.0561755	0.238955	453.973	0.314077	454.689	0.98348	458.313	5.34705	0.494529
z2	0.277028	95.5029	0.785724	5294.39	0.245729	0.0728438	0.0610121	0.564233	0.245846	0.056203	0.221452	453.266	0.267049	454.278	0.900431	459.401	4.96158	0.470101
z3	0.322683	95.0912	0.514499	5640.81	0.160901	0.0730073	0.0596059	0.565441	0.219674	0.0561973	0.19492	454.248	0.261439	455.062	0.805675	459.173	4.38023	0.488642
z4	0.215079	146.904	0.540434	8647.17	0.169018	0.0728741	0.0534631	0.563355	0.184754	0.0560923	0.162757	453.448	0.234097	453.708	0.676002	455.026	3.68078	0.480047
z5	0.409428	175.543	0.575517	10236.7	0.179992	0.072849	0.0522727	0.563617	0.15661	0.0561377	0.130322	453.297	0.228812	453.878	0.573197	456.82	2.97674	0.565338
z6	0.223284	292.392	0.834276	15985.6	0.260903	0.0729559	0.0595171	0.563987	0.140736	0.0560922	0.114998	453.94	0.260879	454.118	0.515314	455.022	2.6486	0.543513
z7	0.711975	80.0938	0.44619	4839.31	0.139544	0.0729026	0.0555369	0.564666	0.224282	0.0562009	0.2	453.619	0.243266	454.559	0.821853	459.316	4.49133	0.496441
Notes:
(a) All analyses are single zircon grains and pre-treated by the thermal annealing and acid leaching (CA-TIMS) technique. Data used in date calculation are in bold.
(b) Pb(c) is total common-Pb in analyses. Pb* is radiogenic Pb concentration.
(c) Measured ratio corrected for spike and fractionation only.
(d) Radiogenic Pb.
(e) Corrected for fractionation, spike and blank. Also corrected for initial Th/U disequilibrium using radiogenic 208Pb and Th/U[magma] = 2.8
Mass fractionation correction of 0.25%/amu ± 0.04%/amu (atomic mass unit) was applied to single-collector Daly analyses.
All common Pb assumed to be laboratory blank. Total procedural blank less than 0.1 pg for U.
Blank isotopic composition: 206Pb/204Pb = 18.20 ± 0.45, 207Pb/204Pb =15.29 ± 0.24, 208Pb/204Pb = 37.16 ± 0.77.
Corr. coef. = correlation coefficient.
Ages calculated using the decay constants λ238 = 1.55125E-10 y-1 and λ235 = 9.8485E-10 y-1 (Jaffey et al. 1971).
